# Supplementary material for: Characterization, Cultivation, and Chloroplast Genome Analysis of Betula Fujianensis
Source: Research Square preprint supplement (doi:10.21203/rs.3.rs-249991/v1), 2021-03-03
Supplement: Supplementary file 1 [file 65e98070dfa325f8e4f257ae.xlsx]

## Sheet: 工作表1
Table S2: SSRs of chloroplast genome of Betula fujianensis.
NO.	type	SSR	size	start	end	NO.	type	SSR	size	start	end
1	p1	(A)9	9	210	218	148	p6	(AACAGA)3	18	62993	63010
2	p1	(A)9	9	272	280	149	c*	(A)9tagaa(ATT)4(T)8*	32	63867	63898
3	p1	(T)8	8	1677	1684	150	p1	(T)9	9	63959	63967
4	p2	(TA)5	10	1756	1765	151	p1	(T)9	9	64024	64032
5	c	(TA)5aatt(TA)5	24	1800	1823	152	p1	(T)8	8	64868	64875
6	p1	(A)8	8	1914	1921	153	p1	(T)8	8	65424	65431
7	p1	(T)9	9	2399	2407	154	p1	(T)9	9	65832	65840
8	p3	(AAT)4	12	3038	3049	155	p1	(A)9	9	66096	66104
9	p1	(A)10	10	3931	3940	156	p2	(TC)5	10	66294	66303
10	p3	(TAA)3	9	4002	4010	157	p1	(C)8	8	67488	67495
11	p1	(A)8	8	4022	4029	158	p1	(A)8	8	67562	67569
12	p1	(T)8	8	4137	4144	159	p1	(T)8	8	68319	68326
13	p1	(T)8	8	4205	4212	160	p3	(AAT)3	9	68580	68588
14	p3	(ATT)5	15	4674	4688	161	p1	(A)9	9	68742	68750
15	p1	(T)8	8	4705	4712	162	p2	(AT)6	12	68844	68855
16	p1	(A)8	8	5159	5166	163	p4	(TTCT)3	12	68907	68918
17	p1	(A)8	8	5232	5239	164	p1	(T)8	8	69048	69055
18	p1	(T)8	8	5318	5325	165	p3	(GTA)3	9	70306	70314
19	p1	(A)8	8	5344	5351	166	p4	(GAAA)3	12	70410	70421
20	p3	(CGA)3	9	5537	5545	167	p3	(AAT)3	9	70437	70445
21	p1	(A)8	8	6346	6353	168	p1	(A)8	8	71273	71280
22	p1	(A)8	8	6719	6726	169	p1	(T)9	9	71552	71560
23	p2	(AT)5	10	6968	6977	170	p1	(G)9	9	71621	71629
24	c	(TTA)3tttattatt(TTA)3	27	7022	7048	171	p3	(TAT)3	9	71819	71827
25	p1	(T)13	13	7120	7132	172	p1	(A)9	9	72225	72233
26	c	(TAT)3actctt(A)12	27	7380	7406	173	p1	(T)9	9	72278	72286
27	p1	(A)15	15	7916	7930	174	p1	(C)8	8	72653	72660
28	p4	(TAAT)3	12	7941	7952	175	p3	(TTA)3	9	72922	72930
29	p3	(TAT)4	12	8051	8062	176	p1	(T)11	11	72997	73007
30	p1	(A)10	10	8386	8395	177	p3	(AAC)3	9	73610	73618
31	p1	(T)8	8	8714	8721	178	p1	(A)8	8	73849	73856
32	p1	(A)8	8	8941	8948	179	p3	(TAT)3	9	73911	73919
33	p4	(TCTT)3	12	9148	9159	180	p3	(AAT)3	9	75747	75755
34	c	(T)8gatttatta(TAT)3	26	9172	9197	181	p1	(T)9	9	76016	76024
35	p2	(AT)6	12	9371	9382	182	c	(A)12t(A)9	22	76168	76189
36	p3	(AAT)3	9	9407	9415	183	p1	(A)9	9	76663	76671
37	p3	(AAT)3	9	9426	9434	184	p2	(AT)6	12	76802	76813
38	c	(T)10gaaaaatg(A)8	26	9606	9631	185	p1	(T)10	10	77020	77029
39	p3	(AAC)3	9	9645	9653	186	p1	(A)9	9	77627	77635
40	p1	(T)10	10	9727	9736	187	c	(T)8gccgctt(TTG)3	24	78708	78731
41	p1	(A)10	10	9770	9779	188	p3	(TCT)3	9	79356	79364
42	p1	(A)9	9	10267	10275	189	p1	(T)8	8	83407	83414
43	p3	(TTA)4	12	10903	10914	190	p1	(A)8	8	83444	83451
44	p1	(T)8	8	11003	11010	191	p1	(T)8	8	85029	85036
45	p3	(AAT)4	12	11036	11047	192	p1	(A)9	9	85300	85308
46	p1	(A)9	9	11219	11227	193	p1	(T)9	9	86129	86137
47	p2	(TA)5	10	11492	11501	194	p1	(T)10	10	86156	86165
48	c	(T)8c(A)10	19	13150	13168	195	p1	(T)8	8	86639	86646
49	p1	(T)9	9	13726	13734	196	p1	(A)9	9	86677	86685
50	p1	(T)11	11	13864	13874	197	p1	(A)8	8	86710	86717
51	p3	(TAG)3	9	14089	14097	198	p1	(T)8	8	86732	86739
52	p1	(A)9	9	14308	14316	199	p1	(T)8	8	88105	88112
53	p2	(TA)5	10	14564	14573	200	p1	(T)9	9	88429	88437
54	p1	(A)11	11	14739	14749	201	p3	(TGC)3	9	89416	89424
55	p1	(T)9	9	15437	15445	202	p1	(T)9	9	89939	89947
56	p1	(T)8	8	15536	15543	203	p3	(GAT)3	9	90556	90564
57	p3	(CTC)4	12	15881	15892	204	p1	(A)9	9	95411	95419
58	p1	(T)8	8	15904	15911	205	p3	(TCT)3	9	96115	96123
59	p1	(T)8	8	16146	16153	206	p3	(CTT)3	9	96221	96229
60	p1	(T)9	9	16342	16350	207	p3	(GGT)3	9	96485	96493
61	p3	(AAC)3	9	16636	16644	208	p3	(GAA)3	9	97951	97959
62	p3	(TTA)3	9	17448	17456	209	p3	(AGA)3	9	101033	101041
63	p1	(T)14	14	18191	18204	210	p3	(AGA)3	9	102478	102486
64	p1	(A)8	8	18360	18367	211	p1	(A)9	9	102640	102648
65	p1	(T)10	10	20308	20317	212	p3	(TTA)3	9	102753	102761
66	p1	(T)9	9	20330	20338	213	p5	(GCAAT)3	15	105217	105231
67	p1	(T)11	11	20436	20446	214	p3	(AAG)3	9	105425	105433
68	p1	(A)8	8	20579	20586	215	p1	(T)8	8	108368	108375
69	p1	(T)12	12	20974	20985	216	p1	(G)9	9	109595	109603
70	p3	(ATT)3	9	21025	21033	217	p3	(CTG)3	9	110158	110166
71	p2	(AT)5	10	21815	21824	218	p4	(AGGT)3	12	111678	111689
72	p3	(TTC)3	9	24084	24092	219	p1	(A)8	8	113467	113474
73	c	(C)9(A)9	18	24502	24519	220	p2	(AG)5	10	113568	113577
74	p1	(T)9	9	24583	24591	221	p3	(CAA)3	9	115231	115239
75	p1	(T)9	9	24917	24925	222	p3	(TAT)4	12	116153	116164
76	p1	(T)10	10	28216	28225	223	p4	(ATTA)3	12	116185	116196
77	p1	(T)8	8	29371	29378	224	c	(CTT)3cg(A)8	19	116979	116997
78	p1	(T)8	8	29700	29707	225	p3	(ATT)4	12	117009	117020
79	p1	(A)8	8	30064	30071	226	p1	(T)9	9	117048	117056
80	p1	(T)8	8	30265	30272	227	p3	(TAA)3	9	117951	117959
81	p1	(T)8	8	31258	31265	228	p1	(T)13	13	118581	118593
82	p1	(T)9	9	33117	33125	229	p1	(A)9	9	118611	118619
83	p4	(AATA)3	12	33373	33384	230	p1	(T)8	8	118779	118786
84	p1	(T)9	9	33471	33479	231	p1	(A)8	8	118891	118898
85	p1	(A)10	10	33797	33806	232	p4	(AAAT)3	12	119326	119337
86	c*	(T)8(TTC)3*	15	33984	33998	233	p3	(TTA)3	9	119490	119498
87	p1	(T)9	9	34454	34462	234	c*	(TA)7(ATA)4*t(ATA)3	33	119525	119557
88	p1	(A)9	9	34634	34642	235	c	(T)8gtcaaac(A)8	23	119738	119760
89	p1	(A)8	8	34818	34825	236	p2	(TA)6	12	119845	119856
90	p3	(AAT)3	9	35075	35083	237	c	(A)10taattatca(AT)5	29	119965	119993
91	p2	(AT)5	10	35208	35217	238	p2	(TA)5	10	120006	120015
92	p1	(A)8	8	35266	35273	239	p4	(TTAA)3	12	120272	120283
93	p4	(TTAT)3	12	35680	35691	240	c	(T)11cc(T)9	22	120407	120428
94	p3	(TAT)3	9	35729	35737	241	p3	(ATT)3	9	120549	120557
95	p1	(T)9	9	35996	36004	242	p1	(A)9	9	121169	121177
96	p3	(TTA)3	9	36361	36369	243	p1	(T)8	8	122000	122007
97	p1	(A)9	9	36386	36394	244	p3	(TAT)4	12	122103	122114
98	p1	(T)8	8	36575	36582	245	p1	(A)8	8	122425	122432
99	p1	(T)8	8	39589	39596	246	p1	(T)8	8	122750	122757
100	p4	(TCTA)3	12	39757	39768	247	p1	(A)9	9	123702	123710
101	p4	(AGAT)3	12	39782	39793	248	p1	(A)9	9	123749	123757
102	p1	(A)9	9	39836	39844	249	p4	(TTGA)3	12	124312	124323
103	p1	(A)8	8	40693	40700	250	c	(T)8atata(T)10a(T)9	33	125770	125802
104	p1	(A)9	9	40950	40958	251	p3	(TTC)3	9	126746	126754
105	p3	(TCT)3	9	41530	41538	252	c	(ATA)3aat(A)8	20	127110	127129
106	p3	(ATG)3	9	43071	43079	253	p1	(T)10	10	127190	127199
107	p3	(TTG)3	9	44676	44684	254	p1	(T)8	8	127432	127439
108	p3	(GCA)3	9	44969	44977	255	p3	(TCT)4	12	127854	127865
109	p1	(A)9	9	46677	46685	256	p3	(AGC)3	9	128158	128166
110	p1	(A)8	8	46743	46750	257	p1	(A)8	8	129881	129888
111	p1	(T)8	8	47869	47876	258	p1	(T)8	8	130238	130245
112	p1	(A)9	9	48820	48828	259	p2	(AT)5	10	130261	130270
113	p1	(A)12	12	49056	49067	260	p3	(TAA)3	9	130282	130290
114	p1	(T)9	9	49244	49252	261	p1	(A)10	10	130496	130505
115	p1	(A)8	8	49266	49273	262	p1	(T)10	10	131545	131554
116	p1	(C)10	10	49285	49294	263	p1	(T)8	8	131595	131602
117	p1	(T)9	9	49334	49342	264	p1	(T)9	9	131633	131641
118	p1	(A)8	8	50594	50601	265	p1	(T)8	8	131871	131878
119	p3	(TAT)3	9	51118	51126	266	p1	(T)8	8	132872	132879
120	p1	(T)8	8	51289	51296	267	p1	(T)9	9	133178	133186
121	p1	(A)9	9	51341	51349	268	p1	(T)8	8	133345	133352
122	p1	(A)9	9	51474	51482	269	p1	(T)8	8	133370	133377
123	p1	(A)9	9	51666	51674	270	c	(T)10aattttaa(T)11	29	133476	133504
124	p1	(T)10	10	52410	52419	271	p3	(AAT)3	9	133834	133842
125	p1	(T)12	12	52556	52567	272	p1	(T)8	8	134033	134040
126	p1	(T)8	8	52611	52618	273	p1	(A)8	8	134097	134104
127	p1	(A)11	11	52918	52928	274	p3	(TTA)3	9	134929	134937
128	p1	(T)9	9	53298	53306	275	p3	(TTG)3	9	135916	135924
129	p1	(T)8	8	53317	53324	276	p2	(CT)5	10	137578	137587
130	p2	(AT)6	12	53394	53405	277	p1	(T)8	8	137681	137688
131	p1	(A)9	9	54123	54131	278	p4	(CTAC)3	12	139464	139475
132	p1	(T)11	11	54832	54842	279	p3	(CAG)3	9	140989	140997
133	p1	(T)8	8	55359	55366	280	p1	(C)9	9	141552	141560
134	p3	(TAT)3	9	55624	55632	281	p1	(A)8	8	142780	142787
135	p3	(TAT)3	9	55653	55661	282	p3	(TCT)3	9	145721	145729
136	c	(T)8attatat(TTA)3	24	55748	55771	283	p5	(CATTG)3	15	145923	145937
137	c	(TTA)4(ATT)3	21	55782	55802	284	p3	(TAA)3	9	148394	148402
138	c	(TTA)3aaat(TTA)3	22	55814	55835	285	p1	(T)9	9	148507	148515
139	p3	(TTA)3	9	55885	55893	286	p3	(TTC)3	9	148668	148676
140	p1	(T)8	8	56404	56411	287	p3	(TCT)3	9	150114	150122
141	p1	(T)9	9	57377	57385	288	p3	(TTC)3	9	153196	153204
142	p1	(T)10	10	59314	59323	289	p3	(ACC)3	9	154662	154670
143	p1	(T)9	9	59809	59817	290	p3	(AAG)3	9	154926	154934
144	p3	(TTG)3	9	60146	60154	291	p3	(AGA)3	9	155032	155040
145	p2	(AT)7	14	61794	61807	292	p1	(T)9	9	155736	155744
146	p1	(T)8	8	62194	62201	293	p3	(ATC)3	9	160591	160599
147	p3	(ATA)3	9	62608	62616	294	p1	(A)9	9	161208	161216
