# Supplementary material for: Characterization, Cultivation, and Chloroplast Genome Analysis of Betula Fujianensis
Source: Research Square preprint supplement (doi:10.21203/rs.3.rs-249991/v1), 2021-03-03
Supplement: Supplementary file 2 [file dc6415e4b3d0f7ea1cdc1d49.xlsx]

## Sheet: 工作表1
Table S5 Analysis of repeated sequences in B. fujianensis
序号	Size（bp）	Type	Repeat Start 1	Repeat Start 2	Gene	Region
1	53	R	55828	55828	IGS	LSC
2	42	F	11060	11088	IGS	LSC
3	39	F	104285	126947	IGS	IRb;SSC
4	39	P	126947	146830	IGS	SSC;IRa
5	37	R	56088	56088	IGS	LSC
6	37	R	116065	116065	IGS	SSC
7	34	R	55849	55849	IGS	LSC
8	32	P	14712	14712	IGS	LSC
9	32	F	55828	55851	IGS	LSC
10	32	F	56112	56143	IGS	LSC
11	32	P	79841	79841	IGS	SSC
12	32	P	134558	134558	ycf1	LSC
13	31	F	7476	7495	IGS	LSC
14	30	R	55828	55828	IGS	LSC
15	30	F	116078	116129	IGS	SSC
16	29	P	8999	49489	tRNA-GCU	tRNA-GGA
17	28	R	6991	6991	IGS	LSC
18	28	P	7063	7063	IGS	LSC
19	28	P	36188	36188	IGS	SSC
20	28	F	55762	55794	IGS	LSC
21	28	R	133475	133475	ycf1	SSC
22	27	R	7013	7013	IGS	LSC
23	27	F	53013	53036	IGS	LSC
24	27	R	53386	53386	IGS	LSC
25	26	P	1791	1791	IGS	LSC
26	26	P	1798	1798	IGS	LSC
27	26	F	55987	56012	IGS	LSC
28	26	F	71573	71599	IGS	LSC
29	25	R	6985	6985	IGS	LSC
30	25	F	9319	9331	IGS	LSC
31	25	R	56122	56122	IGS	LSC
32	25	F	99947	99972	IGS	IRb
33	25	P	99947	151157	IGS	IRb; IRa
34	25	P	99972	151182	IGS	IRb; IRa
35	25	R	116208	116208	IGS	SSC
36	25	F	151157	151182	IGS	IRa
37	24	F	35525	35560	IGS	LSC
38	24	F	35540	35583	IGS	LSC
39	24	F	40545	40563	IGS	LSC
40	24	F	55659	55671	IGS	LSC
41	24	F	55964	56009	IGS	LSC
42	24	R	56087	56156	IGS	LSC
43	24	F	79538	79561	IGS	LSC
44	24	F	97206	97224	ycf2	IRb
45	24	P	97206	153906	ycf2	IRb; IRa
46	24	P	97224	153924	ycf2	IRb; IRa
47	24	P	115354	115354	IGS	IRb
48	24	R	115354	135776	IGS；ycf1	IRb; IRa
49	24	F	116065	116129	IGS	SSC
NOTES: F: forward, R:reverse, C: complement, P: palindromic
